# Supplementary material
Source: MDPI journal article supplement (https://www.mdpi.com/2073-4395/12/2/541)
Supplement: s1 [file s1 › agronomy-1591147-supplementary.pdf]

## Supplementary Information

### **The role of soil moisture information in developing robust climate services for small-holder farmers: evidence from Ghana**

Samuel J. Sutanto<sup>1,2,\*</sup>, S. Paparrizos<sup>1</sup>, G. Kranjac-Berisavljevic<sup>3</sup>, B. M. Jamaldeen<sup>3</sup>, A. K. Issahaku<sup>3</sup>, B. Z. Gandaa<sup>3</sup>, I. Supit<sup>1</sup>, E. van Slobbe<sup>1</sup>

<sup>1</sup> *Water Systems and Global Change Group, Wageningen University and Research, P.O. Box 47,*

*6700 AA, Wageningen, The Netherlands*

<sup>2</sup> *Institute for Marine and Atmospheric research Utrecht, Utrecht University, Utrecht, the Netherlands*

<sup>3</sup> *West African Centre for Water, Irrigation and Sustainable Agriculture (WACWISA), University for Development Studies, Tamale, Ghana*

The Supplementary Information comprises questionnaire that was used during interviews and forum group discussion as follows.

#### **SECTION 1: DEMOGRAPHIC INFORMATION OF FARMER**

Community: ..... Date of interview: ..... / ..... / .....

Enumerators name: ..... Number: .....

Farmer name: ..... Number: .....

Q1. Age: [0] under 25 [1] 25-34 [2] 35-44 [3] 45-54 [4] 55-64  
[5] above 65

Q2. Gender: [0] Female [1] Male

Q3. What is your household size? [0] 2-5 [1] 6-9 [2] 10-13 [3] 14-17  
[4] 18-21 [5] 21+

Q4. Educational background: [0] No formal education [1] Basic [2] JHS  
[3] SHS/ technical /vocational [4] Tertiary.

Q5. Are you the land owner? [0] No [1] Yes

Q6. Are you into animal production? [0] No [1] Yes

If Yes, please specify: .....

Q7. Are you engaged in any non-farm employment (off-farm work)? [0] No [1] Yes

If Yes, please specify: .....

Q8. Number of years in farming: .....

## SECTION 2: AGRICULTURAL INFORMATION

- Q1. Do you have access to any agricultural information that play a role in your farming decision making? [0] No [1] Yes
- Q2. How do you access agriculture information now? [0] TV [1] Radio  
[2] Newspaper [3] Phone (sms, voice call, app: ..... ) [4] Peer farmers [5] Extension officers
- Q3. What kind of information do you receive? (0) water availability (1) seasonal weather forecasts (2) input prices and availability (3) crop/variety selection (4) disease control (5) market prices (6) soil moisture
- Q4. How often do you receive this information? (0) not often (1) often (2) most often (3) very often
- Q5. How much do you depend on water information for agricultural decision-making? [0] Almost always [1] Often [2] Sometimes [3] Rarely [4] Never
- Q6. How much do you depend on weather information for agricultural decision-making? [0] Almost always [1] Often [2] Sometimes [3] Rarely [4] Never
- Q7. How would you rate the quality of information you receive in each case?

| Information type              | Quality rated |      |            |      |           |
|-------------------------------|---------------|------|------------|------|-----------|
|                               | Excellent     | Good | Acceptable | Poor | Very poor |
| water availability            |               |      |            |      |           |
| seasonal weather forecasts    |               |      |            |      |           |
| input prices and availability |               |      |            |      |           |
| crop/variety selection        |               |      |            |      |           |
| diseases control              |               |      |            |      |           |
| market prices                 |               |      |            |      |           |
| soil moisture                 |               |      |            |      |           |

- Q8. How would you rate the significance of information you receive in each case?

| Information type              | Rate            |                |           |                |                |
|-------------------------------|-----------------|----------------|-----------|----------------|----------------|
|                               | Least important | Less important | Important | More important | Most important |
| water availability            |                 |                |           |                |                |
| seasonal weather forecasts    |                 |                |           |                |                |
| input prices and availability |                 |                |           |                |                |
| crop/variety selection        |                 |                |           |                |                |
| diseases control              |                 |                |           |                |                |
| market prices                 |                 |                |           |                |                |
| soil moisture                 |                 |                |           |                |                |

### SECTION 3: SOIL INFORMATION

- Q1. Are you aware of the concept of soil moisture? [0] No [1] Yes  
If No, please specify why.....
- Q2. Do you have an alternative name for soil moisture in your area?  
.....
- Q3. Do you examine soil moisture by hand feeling? [0] No [1] Yes
- Q4. Do you examine soil moisture by smell? [0] No [1] Yes
- Q5. Is the soil color important to you? [0] No [1] Yes
- Q6. Do you measure surface soil moisture/water (upper 5cm) or root zone soil moisture/water (upper 100cm of soil)? [0] Surface [1] Root zone
- Q7. What are the instruments that you currently employ in determination of soil moisture/water content?.....
- Q8. What methods do you use to measure soil moisture/water content? .....
- Q9. Do you use soil moisture information as an indicator for agricultural decision-making?  
[0] No [1] Yes
- Q10. In which decisions of the following do you take soil moisture into account?

| Variable                                            | Least important | Less important | Important | More important | No Idea |
|-----------------------------------------------------|-----------------|----------------|-----------|----------------|---------|
| Land preparation                                    |                 |                |           |                |         |
| Sowing                                              |                 |                |           |                |         |
| Fertilizer application                              |                 |                |           |                |         |
| Weed control                                        |                 |                |           |                |         |
| Pest control                                        |                 |                |           |                |         |
| Harvesting                                          |                 |                |           |                |         |
| Rice varieties                                      |                 |                |           |                |         |
| Which other decisions do you consider soil moisture |                 |                |           |                |         |

- Q11. Do you receive soil moisture information from any other source? [0] No [1] Yes  
If Yes, from where/which organization?.....  
If Yes, what kind of data e.g. real time or forecasts? .....

### SECTION 4: INFORMATION NEEDS

- Q1. How would you rate your understanding of local weather? [0] Excellent  
[1] Somewhat [2] Poor
- Q2. Do you think that weather information is important to make agricultural decisions?  
[0] Strongly agree [1] Agree [2] Undecided [3] Disagree [4] Strongly disagree

Q3. How advanced information should be for rice crop related decision-making?

- [0] Real-time                      [1] 1-day in advance                      [2] 2/3 days in advance  
 [3] 1-week in advance                      [4] 2-weeks in advance                      [5] 1-Month in advance  
 [6] 3-Months / seasonal forecast

Q4. What kind of information do you need to make agricultural decisions? (multiple answers could be provided)

- [0] Rainfall                      [1] Temperature                      [2] Humidity                      [3] Storm  
 [4] Soil moisture

Q5. Do you currently take decisions based on traditional knowledge/natural indicator forecasts?    YES / NO, if yes please provide details: .....

| Indicator's name | Indicator's signal | Month/period | Outcome/prediction |
|------------------|--------------------|--------------|--------------------|
|                  |                    |              |                    |
|                  |                    |              |                    |
|                  |                    |              |                    |
|                  |                    |              |                    |
|                  |                    |              |                    |
